# Supplementary material for: Beta-Glucan modulates monocyte plasticity and differentiation capacity to mitigate DSS-induced colitis
Source: eLife. 2026 Jun 1;14:RP107339. doi: 10.7554/eLife.107339 (PMC13225843; doi:10.7554/eLife.107339)
Supplement: Supplementary file 2. [file elife-107339-supp2.xlsx]

## Sheet: Sheet1
Gene	Primer Sequences
β-actin	Forward: CATCCGTAAAGACCTCTATGCCAAC
	Reverse: ATGGAGCCACCGATCCACA
S100a8	Forward: TCAAGACATCGTTTGAAAGGAAATC
	Reverse: GGTAGACATCAATGAGGTTGCTC
S100a9	Forward: AAAGGCTGTGGGAAGTAATTAAGAG
	Reverse: GCCATTGAGTAAGCCATTCCC
Defa1	Forward: TCAAGAGGCTGCAAAGGAAGAGAAC
	Reverse: TGGTCTCCATGTTCAGCGACAGC
Hmox-1	Forward: CAGGTGATGCTGACAGAGGA
	Reverse: TCTCTGCAGGGGCAGTATCT
Tgf-β1	Forward: CTTCAATACGTCAGACATTCGG
	Reverse: GTAACGCCAGGAATTGTTGCTA
Vegfa	Forward: GCACATAGAGAGAATGAGCTTCC
	Reverse: CTCCGCTCTGAACAAGGCT
Zo-1	Forward: GCTTTAGCGAACAGAAGGAGC
	Reverse: TTCATTTTTCCGAGACTTCACCA
Arg1	Forward: CCAGAAGAATGGAAGAGTCAGTGT
	Reverse: GCAGATATGCAGGGAGTCACC
Nos2	Forward: GGAGTGACGGCAAACATGACT
	Reverse: TCGATGCACAACTGGGTGAAC
Il-1b	Forward: GAGTGTGGATCCCAAGCAAT
	Reverse: TACCAGTTGGGGAACTCTGC
Il-6	Forward: TAGTCCTTCCTACCCCAATTTCC
	Reverse: TTGGTCCTTAGCCACTCCTTC
Ccl2	Forward: TTAAAAACCTGGATCGGAACCAA
	Reverse: GCATTAGCTTCAGATTTACGGGT
Ccl5	Forward: TGCCCACGTCAAGGAGTATTTC
	Reverse: AACCCACTTCTTCTCTGGGTTG
Il22	Forward: CAGCTCCTGTCACATCAGCGGT
	Reverse: AGGTCCAGTTCCCCAATCGCCT
Reg3b	Forward: CTCTCCTGCCTGATGCTCTT
	Reverse: GTAGGAGCCATAAGCCTGGG
Clec7a	Forward: GACTTCAGCACTCAAGACATCC
	Reverse: TTGTGTCGCCAAAATGCTAGG
Lgr5	Forward: CCTACTCGAAGACTTACCCAGT
	Reverse: GCATTGGGGTGAATGATAGCA
